# Supplementary material for: Disentangling global atrophy burden from local structural patterns reveals clinically relevant heterogeneity in mild cognitive impairment
Source: Research Square preprint supplement (doi:10.21203/rs.3.rs-9443570/v1), 2026-05-11
Supplement: Supplementary file 1 [file f08a3b454985b634e6c17d75.docx]

**Supplement Table S1. Excluded ROIs due to insufficient segmentation/availability**

| Excluded ROI | Full Name | Category | Rationale |
| --- | --- | --- | --- |
| Precentral | Precentral Gyrus | Cortical | Insufficient segmentation |
| Postcentral | Postcentral Gyrus | Cortical | Insufficient segmentation |
| Frontal Sup | Superior Frontal Gyrus | Cortical | Insufficient segmentation |
| OFCant | Anterior Orbital Gyrus | Cortical | Insufficient segmentation |
| OFClat | Lateral Orbital Gyrus | Cortical | Insufficient segmentation |
| Cingulate Ant | Anterior Cingulate Cortex | Cortical | missing regional values |
| Parietal Sup | Superior Parietal Gyrus | Cortical | Insufficient segmentation |
| Parietal Inf | Inferior Parietal Gyrus | Cortical | missing regional values |
| Angular | Angular Gyrus | Cortical | Insufficient segmentation |
| SupraMarginal | Supramarginal Gyrus | Cortical | missing regional values |
| Occipital Sup | Superior Occipital Gyrus | Cortical | Insufficient segmentation |
| Occipital Mid | Middle Occipital Gyrus | Cortical | Insufficient segmentation |
| Occipital Inf | Inferior Occipital Gyrus | Cortical | Insufficient segmentation |
| Temporal Pole Mid | Middle Temporal Pole | Cortical | missing regional values |
| Temporal Inf | Inferior Temporal Gyrus | Cortical | missing regional values |
| Cerebellum Crus1 | Cerebellum, Crus I | Cerebellar | Insufficient segmentation |
| Cerebellum Crus2 | Cerebellum, Crus II | Cerebellar | Insufficient segmentation |
| Cerebellum 7b | Cerebellum, Lobule 7b | Cerebellar | Insufficient segmentation |
| Cerebellum 8 | Cerebellum, Lobule 8 | Cerebellar | Insufficient segmentation |
| Cerebellum 10 | Cerebellum, Lobule 10 | Cerebellar | Insufficient segmentation |
| Vermis 7 | Vermis, Lobule 7 | Cerebellar | Insufficient segmentation |
| Vermis 8 | Vermis, Lobule 8 | Cerebellar | Insufficient segmentation |
| Vermis 9 | Vermis, Lobule 9 | Cerebellar | Insufficient segmentation |
| Thal Re | Thalamus, Reticular Nucleus | Subcortical | Insufficient segmentation |
| VTA | Ventral Tegmental Area | Brainstem/Midbrain | Insufficient segmentation |
| LC | Locus Coeruleus | Brainstem | Insufficient segmentation |

ROIs were excluded from ROI-based analyses if the derived regional measure was unavailable (missing rate > 10%) in a non-negligible proportion of participants, indicating insufficient segmentation/measurement stability.

**Supplement Table S2. Comparison of all brain regions among CN, MCI and AD groups**

| **Brain Region** | **CN, Mean ± SD** | **MCI, Mean ± SD** | **AD, Mean ± SD** | **Effect size**  **(ε²)** | **FDR-corrected P** | **Direction** |
| --- | --- | --- | --- | --- | --- | --- |
| Hippocampus | 35.22 ± 1.95 | 34.12 ± 2.07 | 32.76 ± 2.21 | 0.152 | 1.97×10⁻²³ | CN > MCI > AD |
| Medial geniculate nucleus (tMGN) | 0.43 ± 0.08 | 0.40 ± 0.04 | 0.38 ± 0.04 | 0.150 | 2.53×10⁻²³ | CN > MCI > AD |
| Global atrophy index (GAI) | -1.49 ± 2.49 | -0.03 ± 3.04 | 1.81 ± 3.03 | 0.147 | 4.60×10⁻²³ | CN < MCI < AD |
| Parahippocampal gyrus | 32.50 ± 2.37 | 31.63 ± 2.02 | 30.72 ± 1.75 | 0.104 | 2.28×10⁻¹⁶ | CN > MCI > AD |
| Medial pulvinar nucleus (tPuM) | 12.01 ± 4.00 | 13.80 ± 4.84 | 15.71 ± 5.03 | 0.085 | 1.86×10⁻¹³ | CN < MCI < AD |
| Anterior pulvinar nucleus (tPuA) | 1.61 ± 0.82 | 1.73 ± 0.50 | 1.95 ± 0.56 | 0.075 | 4.61×10⁻¹² | CN < MCI < AD |
| Lateral posterior nucleus (tLP) | 2.34 ± 1.05 | 2.77 ± 1.18 | 3.19 ± 1.17 | 0.074 | 6.91×10⁻¹² | CN < MCI < AD |
| Lateral geniculate nucleus (tLGN) | 1.63 ± 0.26 | 1.72 ± 0.32 | 1.89 ± 0.38 | 0.073 | 8.46×10⁻¹² | CN < MCI < AD |
| Lateral pulvinar nucleus (tPuL) | 1.97 ± 0.55 | 2.19 ± 0.63 | 2.43 ± 0.64 | 0.073 | 8.46×10⁻¹² | CN < MCI < AD |
| Intralaminar nucleus (tIL) | 2.07 ± 0.17 | 2.01 ± 0.12 | 1.98 ± 0.13 | 0.053 | 8.04×10⁻⁹ | CN > MCI > AD |
| Amygdala | 9.20 ± 0.79 | 8.91 ± 0.84 | 8.72 ± 1.05 | 0.053 | 8.29×10⁻⁹ | CN > MCI > AD |
| Medial orbitofrontal cortex | 1.62 ± 0.35 | 1.73 ± 0.35 | 1.86 ± 0.43 | 0.049 | 3.67×10⁻⁸ | CN < MCI < AD |
| Lateral mediodorsal nucleus (tMDl) | 1.74 ± 0.19 | 1.66 ± 0.17 | 1.62 ± 0.17 | 0.048 | 3.88×10⁻⁸ | CN > MCI > AD |
| Superior temporal pole | 6.60 ± 0.65 | 6.42 ± 0.68 | 6.24 ± 0.70 | 0.040 | 7.44×10⁻⁷ | CN > MCI > AD |
| Nucleus accumbens | 5.70 ± 0.49 | 5.55 ± 0.46 | 5.42 ± 0.53 | 0.039 | 1.08×10⁻⁶ | CN > MCI > AD |
| Pallidum | 10.45 ± 0.91 | 10.13 ± 0.77 | 9.97 ± 0.83 | 0.036 | 3.18×10⁻⁶ | CN > MCI > AD |
| Lingual gyrus | 35.40 ± 2.19 | 35.03 ± 2.23 | 34.38 ± 2.39 | 0.025 | 0.00018 | CN > MCI > AD |
| Heschl's gyrus | 6.89 ± 0.59 | 6.72 ± 0.54 | 6.63 ± 0.56 | 0.024 | 0.00022 | CN > MCI > AD |
| Ventral posterolateral nucleus (tVPL) | 7.27 ± 0.74 | 7.43 ± 0.80 | 7.66 ± 0.89 | 0.021 | 0.00063 | CN < MCI < AD |
| Rectus gyrus | 7.15 ± 0.77 | 7.26 ± 0.71 | 7.44 ± 0.89 | 0.017 | 0.00239 | CN < MCI < AD |
| Triangular part of inferior frontal gyrus | 5.84 ± 1.29 | 5.87 ± 1.37 | 6.23 ± 1.33 | 0.016 | 0.00269 | CN < MCI < AD |
| Anterior ventral nucleus (tAV) | 0.84 ± 0.19 | 0.84 ± 0.11 | 0.86 ± 0.11 | 0.016 | 0.00294 | CN < MCI < AD |
| Opercular part of inferior frontal gyrus | 8.63 ± 1.19 | 8.69 ± 1.22 | 8.99 ± 1.20 | 0.016 | 0.00294 | CN < MCI < AD |
| Pre-subgenual anterior cingulate cortex | 19.80 ± 1.70 | 20.08 ± 1.71 | 20.45 ± 1.82 | 0.014 | 0.00633 | CN < MCI < AD |
| Supragenual anterior cingulate cortex | 22.80 ± 1.65 | 23.35 ± 1.67 | 23.24 ± 1.73 | 0.013 | 0.00722 | Non-monotonic |
| Ventral lateral nucleus (tVL) | 11.93 ± 0.94 | 12.06 ± 0.96 | 12.24 ± 1.01 | 0.011 | 0.01461 | CN < MCI < AD |
| Cerebellum lobules 4-5 | 35.98 ± 2.55 | 35.74 ± 2.62 | 35.28 ± 2.50 | 0.010 | 0.02156 | CN > MCI > AD |
| Caudate nucleus | 32.61 ± 3.00 | 33.16 ± 3.00 | 33.56 ± 3.25 | 0.007 | 0.05416 | CN < MCI < AD |
| Medial superior frontal gyrus | 5.69 ± 1.94 | 5.61 ± 1.99 | 6.02 ± 2.01 | 0.005 | 0.10756 | Non-monotonic |
| Vermis lobule 10 | 1.10 ± 0.31 | 1.10 ± 0.29 | 1.16 ± 0.31 | 0.005 | 0.10884 | Non-monotonic |
| Cerebellum lobule 3 | 5.57 ± 0.61 | 5.51 ± 0.49 | 5.47 ± 0.59 | 0.003 | 0.20993 | CN > MCI > AD |
| Superior temporal gyrus | 16.80 ± 1.86 | 16.48 ± 1.58 | 16.45 ± 1.75 | 0.003 | 0.25048 | CN > MCI > AD |
| Vermis lobules 1-2 | 0.70 ± 0.09 | 0.70 ± 0.07 | 0.69 ± 0.07 | 0.003 | 0.26064 | CN > MCI > AD |
| Fusiform gyrus | 24.82 ± 2.12 | 24.61 ± 1.88 | 24.37 ± 1.89 | 0.003 | 0.26665 | CN > MCI > AD |
| Posterior cingulate cortex | 14.33 ± 1.06 | 14.43 ± 1.04 | 14.26 ± 1.19 | 0.001 | 0.40137 | Non-monotonic |
| Calcarine cortex | 20.74 ± 1.45 | 20.75 ± 1.56 | 20.49 ± 1.57 | 0.001 | 0.40137 | Non-monotonic |
| Cerebellum lobule 9 | 0.97 ± 0.29 | 0.94 ± 0.23 | 0.99 ± 0.29 | 0.001 | 0.40612 | Non-monotonic |
| Vermis lobule 3 | 3.74 ± 0.54 | 3.69 ± 0.29 | 3.65 ± 0.29 | 0.001 | 0.42348 | CN > MCI > AD |
| Cuneus | 2.66 ± 0.41 | 2.66 ± 0.34 | 2.70 ± 0.40 | 0.001 | 0.43914 | CN < MCI < AD |
| Middle temporal gyrus | 1.16 ± 0.31 | 1.14 ± 0.30 | 1.19 ± 0.39 | 0.001 | 0.43914 | Non-monotonic |
| Vermis lobules 4-5 | 12.60 ± 1.18 | 12.68 ± 0.99 | 12.58 ± 1.03 | 0.000 | 0.55592 | Non-monotonic |
| Precuneus | 40.11 ± 2.76 | 40.37 ± 3.17 | 40.04 ± 3.21 | 0.000 | 0.58785 | Non-monotonic |
| Vermis lobule 6 | 0.29 ± 0.24 | 0.28 ± 0.26 | 0.29 ± 0.26 | 0.000 | 0.58785 | Non-monotonic |
| Medial mediodorsal nucleus (tMDm) | 6.14 ± 0.82 | 6.12 ± 0.68 | 6.19 ± 0.69 | 0.000 | 0.58785 | Non-monotonic |
| Substantia nigra pars reticulata | 1.74 ± 0.12 | 1.73 ± 0.12 | 1.73 ± 0.13 | 0.000 | 0.58785 | Non-monotonic |
| Orbital part of inferior frontal gyrus | 5.60 ± 0.67 | 5.59 ± 0.61 | 5.66 ± 0.62 | 0.000 | 0.59162 | Non-monotonic |
| Ventromedial prefrontal cortex | 9.57 ± 0.88 | 9.60 ± 0.84 | 9.65 ± 0.74 | 0.000 | 0.59162 | CN < MCI < AD |
| Insula | 61.13 ± 2.73 | 61.01 ± 2.30 | 60.85 ± 2.47 | 0.000 | 0.60569 | CN > MCI > AD |
| Substantia nigra pars compacta | 1.08 ± 0.08 | 1.08 ± 0.08 | 1.07 ± 0.09 | 0.002 | 0.61844 | CN > MCI > AD |
| Supplementary motor area | 25.56 ± 3.88 | 25.42 ± 3.87 | 25.76 ± 3.89 | 0.000 | 0.67156 | Non-monotonic |
| Putamen | 41.71 ± 2.52 | 41.87 ± 2.30 | 41.81 ± 2.42 | 0.000 | 0.67842 | Non-monotonic |
| Middle cingulate cortex | 78.40 ± 4.83 | 78.64 ± 4.96 | 78.22 ± 4.97 | 0.000 | 0.70512 | Non-monotonic |
| Posterior orbitofrontal cortex | 5.94 ± 1.12 | 5.94 ± 0.73 | 5.96 ± 0.80 | 0.000 | 0.76972 | Non-monotonic |
| Paracentral lobule | 6.65 ± 1.07 | 6.58 ± 1.09 | 6.57 ± 1.16 | 0.000 | 0.77468 | CN > MCI > AD |
| Cerebellum lobule 6 | 14.46 ± 1.79 | 14.31 ± 1.56 | 14.45 ± 1.76 | 0.000 | 0.81097 | Non-monotonic |
| Dorsal raphe nucleus | 0.20 ± 0.03 | 0.20 ± 0.02 | 0.20 ± 0.02 | 0.000 | 0.81097 | Non-monotonic |
| Ventral anterior nucleus (tVA) | 2.80 ± 0.33 | 2.80 ± 0.23 | 2.81 ± 0.28 | 0.000 | 0.89263 | Non-monotonic |
| Rolandic operculum | 17.25 ± 1.65 | 17.13 ± 1.30 | 17.19 ± 1.32 | 0.000 | 0.94018 | Non-monotonic |
| Olfactory cortex | 11.70 ± 0.90 | 11.70 ± 0.76 | 11.63 ± 0.72 | 0.000 | 0.94018 | CN > MCI > AD |
| Subgenual anterior cingulate cortex | 6.37 ± 0.77 | 6.31 ± 0.53 | 6.30 ± 0.56 | 0.000 | 0.94018 | CN > MCI > AD |
| Red nucleus | 2.06 ± 0.17 | 2.06 ± 0.15 | 2.07 ± 0.16 | 0.000 | 0.97701 | CN < MCI < AD |
| Median raphe nucleus | 0.03 ± 0.01 | 0.03 ± 0.01 | 0.03 ± 0.01 | 0.000 | 0.97701 | Non-monotonic |

All brain region volumes were pre-adjusted for total intracranial volume (TIV); Effect size ε² is the Epsilon squared value from Kruskal-Wallis test; p-values were corrected for multiple comparisons using the false discovery rate (FDR) method; "CN > MCI > AD" in the Direction column indicates that brain volume decreases with disease progression, "CN < MCI < AD" indicates that it increases with disease progression, and "Non-monotonic" indicates no monotonic trend among the three groups

**Supplement Table S3. Multivariable regression results for the associations of GAI with MMSE, ADAS-Cog 13, and FAQ in the full sample and MCI subgroup**

| **Brain Region** | **n** | **Test** | **FDR-corrected P** | **Partial η²** | **Selected Candidate** |
| --- | --- | --- | --- | --- | --- |
| Hippocampus | 731 | LM_Type3 | 4.51×10⁻²⁷ | 0.161 | 1 |
| Medial geniculate nucleus (tMGN) | 731 | LM_Type3 | 1.80×10⁻¹⁶ | 0.100 | 1 |
| Lateral geniculate nucleus (tLGN) | 731 | LM_Type3 | 1.68×10⁻¹⁵ | 0.088 | 1 |
| Parahippocampal gyrus | 731 | LM_Type3 | 6.45×10⁻¹⁵ | 0.091 | 1 |
| Medial pulvinar nucleus (tPuM) | 731 | LM_Type3 | 7.03×10⁻¹⁵ | 0.083 | 1 |
| Lateral posterior nucleus (tLP) | 731 | LM_Type3 | 2.89×10⁻¹³ | 0.073 | 1 |
| Lateral pulvinar nucleus (tPuL) | 731 | LM_Type3 | 4.59×10⁻¹³ | 0.072 | 1 |
| Intralaminar nucleus (tIL) | 731 | LM_Type3 | 1.95×10⁻⁰⁹ | 0.057 | 1 |
| Lateral mediodorsal nucleus (tMDl) | 731 | LM_Type3 | 1.95×10⁻⁰⁹ | 0.055 | 1 |
| Nucleus accumbens | 731 | LM_Type3 | 4.39×10⁻⁰⁸ | 0.046 | 1 |
| Pallidum | 731 | LM_Type3 | 5.20×10⁻⁰⁸ | 0.048 | 1 |
| Medial orbitofrontal cortex | 731 | LM_Type3 | 1.15×10⁻⁰⁷ | 0.050 | 1 |
| Anterior pulvinar nucleus (tPuA) | 731 | LM_Type3 | 2.26×10⁻⁰⁷ | 0.042 | 1 |
| Amygdala | 731 | LM_Type3 | 4.49×10⁻⁰⁶ | 0.039 | 1 |
| Superior temporal pole | 731 | LM_Type3 | 6.55×10⁻⁰⁶ | 0.037 | 1 |
| Ventral posterolateral nucleus (tVPL) | 731 | LM_Type3 | 9.09×10⁻⁰⁶ | 0.030 | 1 |
| Heschl's gyrus | 731 | LM_Type3 | 2.05×10⁻⁰⁵ | 0.028 | 1 |
| Lingual gyrus | 731 | LM_Type3 | 5.52×10⁻⁰⁵ | 0.027 | 1 |
| Supragenual anterior cingulate cortex | 731 | LM_Type3 | 0.00499 | 0.020 | 1 |
| Ventral lateral nucleus (tVL) | 731 | LM_Type3 | 0.01057 | 0.013 | 1 |
| Rectus gyrus | 731 | LM_Type3 | 0.01286 | 0.019 | 1 |
| Pre-subgenual anterior cingulate cortex | 731 | LM_Type3 | 0.01447 | 0.018 | 1 |
| Caudate nucleus | 731 | LM_Type3 | 0.01599 | 0.013 | 1 |
| Cerebellum lobules 4-5 | 731 | LM_Type3 | 0.02141 | 0.011 | 1 |
| Triangular part of inferior frontal gyrus | 731 | LM_Type3 | 0.02378 | 0.014 | 1 |
| Opercular part of inferior frontal gyrus | 731 | LM_Type3 | 0.03281 | 0.013 | 1 |
| Vermis lobule 3 | 731 | LM_Type3 | 0.04862 | 0.007 | 1 |

All comparisons were performed using linear regression models (Type III ANOVA) adjusted for age, sex, and education years; Partial η² is the partial eta-squared effect size; p-values were corrected for multiple comparisons using the false discovery rate (FDR) method; Selected Candidate=1 indicates that the brain region was selected as a candidate feature for subsequent MCI subtype clustering analysis.

**Supplement Table S4. Principal component loading matrix of local structural features for MCI subtype clustering**

| **Brain Region** | **PC1** | **PC2** | **PC3** | **PC4** | **PC5** | **PC6** | **PC7** | **PC8** | **PC9** | **PC10** | **PC11** | **PC12** | **PC13** | **PC14** | **PC15** | **PC16** | **PC17** | **PC18** | **PC19** | **PC20** | **PC21** | **PC22** |
| --- | --- | --- | --- | --- | --- | --- | --- | --- | --- | --- | --- | --- | --- | --- | --- | --- | --- | --- | --- | --- | --- | --- |
| Hippocampus | 0.059 | 0.173 | 0.489 | -0.146 | -0.188 | -0.069 | -0.016 | -0.157 | -0.251 | -0.292 | -0.066 | 0.158 | -0.228 | -0.250 | 0.178 | 0.253 | -0.080 | -0.443 | 0.134 | -0.147 | -0.105 | 0.020 |
| Medial geniculate nucleus (tMGN) | 0.105 | 0.063 | 0.157 | 0.117 | -0.362 | 0.443 | -0.508 | 0.058 | 0.093 | 0.168 | 0.207 | 0.367 | -0.003 | 0.148 | 0.151 | -0.240 | 0.183 | -0.011 | 0.021 | 0.007 | 0.072 | 0.028 |
| Parahippocampal gyrus | -0.205 | 0.018 | 0.492 | 0.017 | 0.162 | -0.141 | 0.071 | -0.093 | -0.100 | -0.014 | 0.016 | 0.256 | -0.172 | 0.050 | 0.115 | 0.020 | 0.042 | 0.569 | -0.286 | 0.352 | -0.018 | 0.053 |
| Lateral posterior nucleus (tLP) | 0.344 | -0.161 | 0.068 | -0.184 | 0.117 | -0.237 | -0.064 | -0.053 | -0.156 | 0.052 | -0.011 | 0.031 | 0.017 | 0.133 | 0.192 | -0.049 | -0.076 | 0.172 | 0.135 | -0.322 | 0.668 | 0.229 |
| Lateral geniculate nucleus (tLGN) | 0.336 | -0.115 | 0.162 | -0.118 | 0.064 | -0.194 | -0.040 | -0.095 | 0.035 | 0.078 | 0.021 | 0.172 | 0.105 | 0.114 | -0.327 | -0.436 | -0.425 | -0.094 | -0.081 | -0.008 | -0.407 | 0.248 |
| Intralaminar nucleus (tIL) | 0.116 | -0.151 | 0.134 | 0.507 | 0.075 | 0.351 | -0.028 | -0.221 | 0.166 | -0.037 | -0.062 | -0.058 | 0.002 | -0.175 | -0.076 | 0.287 | -0.416 | 0.294 | 0.138 | -0.272 | -0.035 | -0.013 |
| Amygdala | 0.196 | -0.017 | 0.401 | -0.042 | -0.188 | 0.126 | 0.128 | 0.262 | 0.071 | -0.306 | 0.033 | -0.358 | 0.140 | -0.224 | -0.413 | -0.209 | 0.314 | 0.151 | -0.069 | -0.077 | 0.138 | -0.027 |
| Medial orbitofrontal cortex | -0.101 | -0.359 | 0.005 | -0.017 | 0.114 | -0.020 | -0.273 | 0.438 | 0.266 | -0.434 | -0.295 | -0.074 | -0.144 | 0.039 | 0.365 | -0.142 | -0.175 | -0.048 | -0.123 | -0.005 | -0.072 | 0.012 |
| Lateral mediodorsal nucleus (tMDl) | 0.088 | -0.295 | 0.037 | 0.473 | 0.150 | 0.094 | 0.298 | -0.291 | -0.048 | -0.043 | -0.118 | 0.052 | -0.136 | 0.012 | 0.060 | -0.304 | 0.227 | -0.409 | -0.159 | 0.213 | 0.219 | 0.055 |
| Superior temporal pole | -0.183 | -0.038 | 0.419 | -0.014 | -0.028 | 0.106 | 0.251 | 0.081 | 0.052 | 0.298 | 0.151 | -0.378 | 0.378 | 0.301 | 0.382 | -0.037 | -0.185 | -0.168 | 0.071 | 0.004 | -0.042 | -0.028 |
| Nucleus accumbens | 0.003 | 0.168 | -0.010 | 0.364 | -0.342 | -0.422 | -0.124 | 0.138 | -0.079 | 0.381 | -0.134 | -0.248 | -0.182 | -0.373 | 0.164 | -0.225 | -0.099 | 0.069 | -0.111 | -0.047 | -0.003 | 0.000 |
| Pallidum | -0.029 | 0.025 | 0.011 | 0.441 | -0.287 | -0.450 | -0.045 | 0.068 | 0.005 | -0.343 | 0.192 | 0.062 | 0.108 | 0.519 | -0.158 | 0.189 | 0.009 | -0.025 | 0.096 | 0.003 | 0.020 | -0.047 |
| Lingual gyrus | -0.034 | 0.337 | 0.064 | 0.030 | 0.211 | 0.048 | -0.491 | -0.365 | -0.161 | -0.109 | -0.395 | -0.408 | 0.121 | 0.234 | -0.066 | -0.090 | 0.072 | -0.004 | -0.014 | 0.097 | 0.000 | 0.028 |
| Heschl's gyrus | -0.012 | -0.041 | -0.009 | -0.224 | -0.359 | -0.177 | 0.083 | -0.502 | 0.679 | -0.041 | -0.159 | -0.011 | 0.058 | -0.031 | 0.123 | 0.013 | 0.112 | 0.068 | -0.037 | 0.005 | 0.028 | 0.033 |
| Ventral posterolateral nucleus (tVPL) | 0.386 | -0.116 | 0.030 | -0.122 | -0.052 | -0.035 | -0.140 | -0.038 | -0.004 | 0.052 | 0.068 | -0.066 | 0.001 | -0.015 | -0.027 | 0.140 | -0.263 | -0.077 | -0.179 | 0.395 | 0.188 | -0.683 |
| Rectus gyrus | -0.152 | -0.320 | 0.271 | -0.027 | 0.052 | -0.111 | -0.155 | 0.177 | 0.135 | 0.444 | -0.391 | 0.093 | -0.118 | 0.100 | -0.383 | 0.267 | 0.174 | -0.157 | 0.230 | 0.030 | 0.049 | -0.017 |
| Triangular part of inferior frontal gyrus | -0.269 | -0.327 | -0.001 | -0.112 | -0.087 | 0.014 | -0.197 | -0.208 | -0.136 | 0.065 | 0.301 | -0.209 | -0.200 | 0.089 | -0.149 | 0.103 | 0.010 | -0.091 | -0.570 | -0.384 | -0.013 | -0.009 |
| Anterior ventral nucleus (tAV) | 0.345 | -0.239 | 0.012 | 0.024 | 0.100 | -0.110 | 0.017 | -0.097 | -0.142 | 0.060 | -0.026 | -0.052 | -0.039 | 0.106 | 0.266 | -0.027 | 0.454 | 0.203 | 0.158 | -0.274 | -0.486 | -0.310 |
| Opercular part of inferior frontal gyrus | -0.259 | -0.339 | -0.031 | -0.102 | -0.118 | -0.020 | -0.131 | -0.210 | -0.143 | -0.103 | 0.298 | -0.233 | -0.241 | -0.106 | -0.055 | -0.243 | -0.089 | 0.108 | 0.575 | 0.275 | 0.002 | 0.007 |
| Pre-subgenual anterior cingulate cortex | -0.213 | -0.312 | -0.035 | 0.034 | -0.093 | -0.115 | -0.165 | -0.097 | -0.267 | -0.077 | -0.121 | 0.241 | 0.720 | -0.346 | 0.039 | 0.008 | 0.044 | 0.013 | -0.052 | 0.021 | 0.007 | -0.045 |
| Ventral lateral nucleus (tVL) | 0.360 | -0.177 | -0.073 | 0.013 | -0.078 | 0.021 | -0.129 | 0.057 | -0.033 | 0.048 | 0.141 | -0.241 | 0.053 | -0.081 | 0.115 | 0.435 | 0.131 | -0.027 | -0.106 | 0.396 | -0.144 | 0.554 |
| Cerebellum lobules 4-5 | -0.027 | 0.135 | 0.146 | 0.122 | 0.537 | -0.267 | -0.279 | -0.008 | 0.375 | 0.019 | 0.464 | 0.007 | 0.091 | -0.280 | 0.018 | 0.005 | 0.152 | -0.179 | 0.059 | -0.045 | 0.035 | -0.044 |

All features are brain volume residuals adjusted for age, sex, education years, and global atrophy index (GAI); Values represent the loading of each brain region feature on the corresponding principal component; Larger absolute loading values indicate greater contribution of the brain region to that principal component; Based on the criterion of cumulative variance explained ≥ 80%, all 22 principal components were retained for subsequent MCI subtype clustering analysis.

**Supplement Table S5. Part A. Multivariable linear regression analyses of associations between local residual region of interest (ROI) features and clinical outcomes in the mild cognitive impairment (MCI) subgroup**

| **Method** | **Candidate k range** | **Criterion used** | **Optimal k** | **Best silhouette** | **Agreement with final solution (ARI)** |
| --- | --- | --- | --- | --- | --- |
| K-means | 2–5 | Silhouette | 2 | 0.140 | 1.000 |
| Gaussian mixture model | 2–5 | BIC and silhouette | 2 | 0.716 | 0.001 |
| Hierarchical clustering | 2–5 | Silhouette | 2 | 0.115 | 0.141 |
| Partitioning around medoids | 2–5 | Silhouette | 2 | 0.128 | 0.409 |

Agreement across clustering methods was evaluated relative to the final K-means two-cluster solution. All tested methods identified a two-cluster structure as the optimal solution within the candidate range of k = 2–5. Considering interpretability and overall consistency with downstream analyses, the K-means two-cluster solution was retained for the main analysis.

Abbreviations: ARI, adjusted Rand index; BIC, Bayesian information criterion; GMM, Gaussian mixture model; HC, hierarchical clustering; PAM, partitioning around medoids.

**Part B. Stability of the final K-means two-cluster solution**

| **Stability metric** | **Mean ± SD** | **Median (Q1–Q3)** |
| --- | --- | --- |
| Adjusted Rand index | 0.680 ± 0.225 | 0.736 (0.593–0.825) |
| Mean Jaccard coefficient | 0.824 ± 0.160 | 0.867 (0.795–0.912) |

The upper panel compares candidate clustering methods and their agreement with the final K-means two-cluster solution. The lower panel summarizes resampling-based stability of the selected K-means solution. Higher ARI and Jaccard values indicate better cluster reproducibility.

**Supplementary Table S6. Method concordance and sensitivity analysis results for MCI subtype clustering**

**Part A.**

| **Comparison** | **Adjusted Rand Index (ARI)** | **Number of clusters (k) for method 1** | **Number of clusters (k) for method 2** |
| --- | --- | --- | --- |
| K-means vs. Gaussian Mixture Model (GMM) | 0.001 | 2 | 2 |
| K-means vs. Hierarchical Clustering (HC) | 0.141 | 2 | 2 |
| K-means vs. Partitioning Around Medoids (PAM) | 0.409 | 2 | 2 |

**Part B.**

| **Approach** | **Number of clusters (k)** | **ARI vs. final clustering** | **Silhouette coefficient** |
| --- | --- | --- | --- |
| K-means on raw residual features | 2 | 0.989 | 0.115 |
|  | 3 | 0.320 | 0.088 |
|  | 4 | 0.321 | 0.089 |
|  | 5 | 0.186 | 0.085 |
| PAM on raw residual features | 2 | 0.319 | 0.091 |
|  | 3 | 0.230 | 0.055 |
|  | 4 | 0.135 | 0.053 |
|  | 5 | 0.119 | 0.054 |

Adjusted Rand Index (ARI) measures the agreement between two clustering results, ranging from -1 to 1, with values closer to 1 indicating higher concordance; Silhouette coefficient measures the compactness and separation of clusters, ranging from -1 to 1, with values closer to 1 indicating better clustering quality; The final clustering method was K-means clustering (k=2) based on PCA-reduced features; raw residual features refers to brain volume residuals adjusted for age, sex, education years, and global atrophy index (GAI), rather than principal components after PCA dimensionality reduction.

**Supplementary Table S7. Differences in all brain region volumes between the two MCI subtypes**

| **Brain Region** | **n** | **Test** | **FDR-corrected P** | **Partial η²** |
| --- | --- | --- | --- | --- |
| Ventral posterolateral nucleus (tVPL) | 351 | LM_Type3 | 1.02×10⁻⁴⁵ | 0.461 |
| Ventral lateral nucleus (tVL) | 351 | LM_Type3 | 2.89×10⁻⁴³ | 0.434 |
| Lateral pulvinar nucleus (tPuL) | 351 | LM_Type3 | 3.67×10⁻³⁵ | 0.389 |
| Anterior pulvinar nucleus (tPuA) | 351 | LM_Type3 | 9.01×10⁻³³ | 0.367 |
| Medial pulvinar nucleus (tPuM) | 351 | LM_Type3 | 9.80×10⁻³³ | 0.366 |
| Anterior ventral nucleus (tAV) | 351 | LM_Type3 | 4.03×10⁻³² | 0.352 |
| Lateral geniculate nucleus (tLGN) | 351 | LM_Type3 | 1.25×10⁻³¹ | 0.351 |
| Lateral posterior nucleus (tLP) | 351 | LM_Type3 | 1.95×10⁻³⁰ | 0.346 |
| Caudate nucleus | 351 | LM_Type3 | 2.57×10⁻²⁹ | 0.309 |
| Triangular part of inferior frontal gyrus | 351 | LM_Type3 | 2.49×10⁻²⁶ | 0.257 |
| Medial superior frontal gyrus | 351 | LM_Type3 | 1.61×10⁻²⁴ | 0.244 |
| Opercular part of inferior frontal gyrus | 351 | LM_Type3 | 3.13×10⁻²³ | 0.231 |
| Medial mediodorsal nucleus (tMDm) | 351 | LM_Type3 | 1.25×10⁻¹⁷ | 0.200 |
| Ventral anterior nucleus (tVA) | 351 | LM_Type3 | 8.74×10⁻¹⁵ | 0.155 |
| Supplementary motor area | 351 | LM_Type3 | 2.81×10⁻¹² | 0.132 |
| Posterior orbitofrontal cortex | 351 | LM_Type3 | 1.08×10⁻¹¹ | 0.119 |
| Orbital part of inferior frontal gyrus | 351 | LM_Type3 | 1.71×10⁻¹¹ | 0.115 |
| Pre-subgenual anterior cingulate cortex | 351 | LM_Type3 | 4.37×10⁻¹¹ | 0.115 |
| Parahippocampal gyrus | 351 | LM_Type3 | 1.03×10⁻¹⁰ | 0.127 |
| Superior temporal gyrus | 351 | LM_Type3 | 1.57×10⁻¹⁰ | 0.105 |
| Middle temporal gyrus | 351 | LM_Type3 | 5.24×10⁻¹⁰ | 0.095 |
| Superior temporal pole | 351 | LM_Type3 | 1.24×10⁻⁰⁸ | 0.095 |
| Rectus gyrus | 351 | LM_Type3 | 1.54×10⁻⁰⁷ | 0.072 |
| Amygdala | 351 | LM_Type3 | 2.65×10⁻⁰⁷ | 0.067 |
| Cerebellum lobule 3 | 351 | LM_Type3 | 1.30×10⁻⁰⁶ | 0.059 |
| Ventromedial prefrontal cortex | 351 | LM_Type3 | 2.24×10⁻⁰⁶ | 0.064 |
| Paracentral lobule | 351 | LM_Type3 | 3.45×10⁻⁰⁶ | 0.064 |
| Red nucleus | 351 | LM_Type3 | 1.98×10⁻⁰⁵ | 0.056 |
| Intralaminar nucleus (tIL) | 351 | LM_Type3 | 2.03×10⁻⁰⁵ | 0.046 |
| Insula | 351 | LM_Type3 | 4.39×10⁻⁰⁵ | 0.052 |
| Vermis lobules 1-2 | 351 | LM_Type3 | 4.78×10⁻⁰⁵ | 0.044 |
| Substantia nigra pars reticulata | 351 | LM_Type3 | 5.64×10⁻⁰⁵ | 0.048 |
| Precuneus | 351 | LM_Type3 | 6.57×10⁻⁰⁵ | 0.046 |
| Medial orbitofrontal cortex | 351 | LM_Type3 | 0.00011 | 0.036 |
| Cuneus | 351 | LM_Type3 | 0.00025 | 0.034 |
| Lateral mediodorsal nucleus (tMDl) | 351 | LM_Type3 | 0.00025 | 0.030 |
| Fusiform gyrus | 351 | LM_Type3 | 0.00045 | 0.033 |
| Substantia nigra pars compacta | 351 | LM_Type3 | 0.00065 | 0.035 |
| Rolandic operculum | 351 | LM_Type3 | 0.00113 | 0.027 |
| Dorsal raphe nucleus | 351 | LM_Type3 | 0.00113 | 0.030 |
| Cerebellum lobule 9 | 351 | LM_Type3 | 0.00135 | 0.025 |
| Vermis lobule 3 | 351 | LM_Type3 | 0.00292 | 0.023 |
| Calcarine cortex | 351 | LM_Type3 | 0.00516 | 0.027 |
| Median raphe nucleus | 351 | LM_Type3 | 0.00563 | 0.024 |
| Medial geniculate nucleus (tMGN) | 351 | LM_Type3 | 0.01280 | 0.011 |
| Nucleus accumbens | 351 | LM_Type3 | 0.01280 | 0.006 |
| Lingual gyrus | 351 | LM_Type3 | 0.01989 | 0.023 |
| Vermis lobule 6 | 351 | LM_Type3 | 0.02583 | 0.012 |
| Vermis lobule 10 | 351 | LM_Type3 | 0.02818 | 0.010 |
| Cerebellum lobule 6 | 351 | LM_Type3 | 0.03846 | 0.009 |
| Vermis lobules 4-5 | 351 | LM_Type3 | 0.04607 | 0.010 |
| Putamen | 351 | LM_Type3 | 0.05430 | 0.008 |
| Cerebellum lobules 4-5 | 351 | LM_Type3 | 0.13545 | 0.004 |
| Pallidum | 351 | LM_Type3 | 0.15289 | 0.001 |
| Supragenual anterior cingulate cortex | 351 | LM_Type3 | 0.21999 | 0.007 |
| Middle cingulate cortex | 351 | LM_Type3 | 0.23148 | 0.007 |
| Heschl's gyrus | 351 | LM_Type3 | 0.25290 | 0.006 |
| Global atrophy index (GAI) | 351 | LM_Type3 | 0.33798 | 0.004 |
| Olfactory cortex | 351 | LM_Type3 | 0.47554 | 0.000 |
| Hippocampus | 351 | LM_Type3 | 0.50439 | 0.000 |
| Subgenual anterior cingulate cortex | 351 | LM_Type3 | 0.76230 | 0.000 |
| Posterior cingulate cortex | 351 | LM_Type3 | 0.80130 | 0.001 |

All comparisons were performed using linear regression models (Type III ANOVA) adjusted for age, sex, education years, and global atrophy index (GAI); Partial η² is the partial eta-squared effect size; p-values were corrected for multiple comparisons using the false discovery rate (FDR) method; Results are sorted by FDR-corrected p-value in ascending order.

**Supplementary Table S8. Cross-validation resampling results for clinical outcome prediction and MCI subtype classification**

**Part A.**

| Outcome | Metric | Mean ± SD | Median |
| --- | --- | --- | --- |
| ADAS-cog13 | Baseline model CV-R² | 0.100 ± 0.087 | 0.107 |
|  | Extended model CV-R² | 0.074 ± 0.119 | 0.091 |
|  | ΔR² (Extended vs. Baseline) | -0.026 ± 0.097 | -0.010 |
| FAQ | Baseline model CV-R² | 0.087 ± 0.080 | 0.099 |
|  | Extended model CV-R² | 0.036 ± 0.107 | 0.036 |
|  | ΔR² (Extended vs. Baseline) | -0.051 ± 0.082 | -0.044 |
| NPI | Baseline model CV-R² | -0.022 ± 0.055 | -0.013 |
|  | Extended model CV-R² | -0.124 ± 0.113 | -0.107 |
|  | ΔR² (Extended vs. Baseline) | -0.102 ± 0.094 | -0.084 |

**Part B.**

| **Metric** | **Mean ± SD** | **Median** | **25th Percentile** | **75th Percentile** |
| --- | --- | --- | --- | --- |
| AUC | 0.999 ± 0.001 | 1.000 | 0.998 | 1.000 |
| Accuracy | 0.981 ± 0.015 | 0.986 | 0.971 | 0.986 |

All cross-validations were performed using 5-fold cross-validation repeated 20 times; The baseline model was adjusted for age, sex, education years, and global atrophy index (GAI); The extended model added all covariate-adjusted candidate brain region volume features to the baseline model; ΔR² represents the additional variance explained by the extended model compared to the baseline model; MCI subtype classification was based on the LASSO-Logistic regression model using all covariate-adjusted brain volume residual features.
